# Supplementary material for: Efficacy of Low‐dose (2 millicurie) versus Standard‐dose (4 millicurie) Radioiodine Treatment for Cats with Mild‐to‐Moderate Hyperthyroidism
Source: PubMed Central journal article supplement — J Vet Intern Med. 2017 Feb 3;31(2):326–34. doi: 10.1111/jvim.14646 (PMC5354058; doi:10.1111/jvim.14646), 2017-02-03
Supplement: JVIM-31-326-s002.pdf [file JVIM-31-326-s002.pdf]

**Comparison of serum creatinine concentrations in cats that develop overt hypothyroidism, subclinical hypothyroidism, or euthyroidism after  $^{131}\text{I}$  treatment**

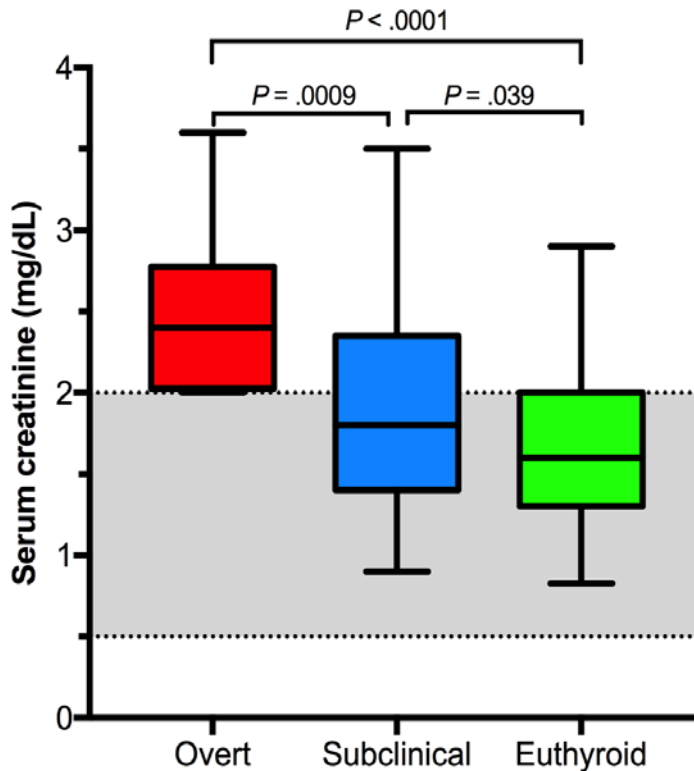

**Figure legend:** Box plots of serum creatinine concentrations in 184 cats measured 6 months after treatment with  $^{131}\text{I}$  (both low- and standard-dose groups are combined). The 184 cats are subdivided into 3 groups on the basis of their outcome category: overt hypothyroid (n=8), subclinical hypothyroid (n=49), or euthyroid (n=127). The 5 cats with persistent hyperthyroidism have been excluded from this analysis.

The Kruskal–Wallis test, followed by the Dunn multiple comparisons test, was used to determine whether creatinine concentrations differed among the 3 groups of cats. Significant differences between the 3 groups are indicated.

Shaded area represents the reference interval for serum creatinine. Boxes represent the interquartile range (IQR) from the 25th to 75th percentile. The horizontal bar in each box represents the median value, whereas the T-bars represent the range of the data.
